# Supplementary material
Source: Springer Nature journal article supplement (https://www.springermedizin.de/resource/supplementary/13054_2010_8594_MOESM5_ESM.pdf/9732322)

**Volume of gas (ml)**

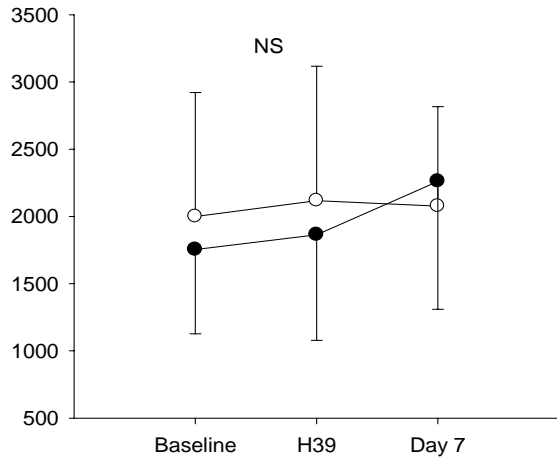

**Volume of tissue (ml)**

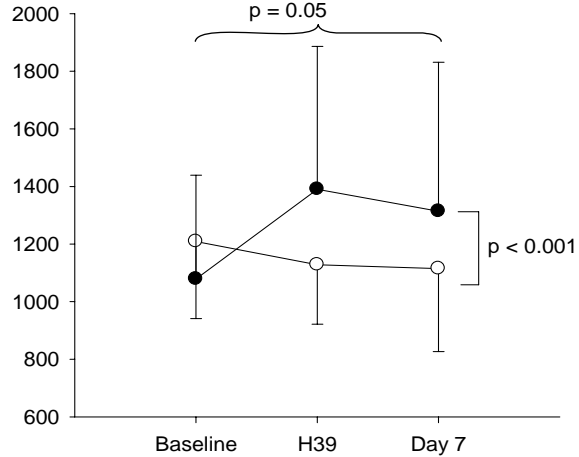

Supplement: MOESM5 [file 9732322]
